# Supplementary material for: Adsorption characteristics of Cd(ii) in aqueous solutions using spent mushroom substrate biochars produced at different pyrolysis temperatures
Source: Royal Society of Chemistry journal article supplement (doi:10.1039/c8ra03958e), 2018-01-01
Supplement: c8ra03958e1.pdf [file c8ra03958e1.pdf]

1 Adsorption Characteristics of Cd(II) in Aqueous Solutions using Spent Mushroom Substrate Biochars

2 Produced at Different Pyrolysis Temperatures

3

4 Yang Xian<sup>1</sup>, Jun Wu<sup>1\*</sup>, Gang Yang<sup>1</sup>, Ruiting Liao<sup>1</sup>, Xiaohong Zhang<sup>1</sup>, Hong Peng<sup>1</sup>, Xiaoyu Yu<sup>1</sup>, Fei

5 Shen<sup>1</sup>, Li Li<sup>1</sup>, Lilin Wang<sup>1</sup>.

6

7 <sup>1</sup>College of Environmental science, Sichuan Agricultural University, Chengdu 611130, P.R. China

8

9 #Address correspondence to Jun Wu, [wuj1962@163.com](mailto:wuj1962@163.com)

10

11

12

13

14 Table S1 Main function groups observed for biochars.

| Wave number(cm <sup>-1</sup> ) | Function groups                                                               | Compounds                                     |
|--------------------------------|-------------------------------------------------------------------------------|-----------------------------------------------|
| 3200-3700                      | OH stretching                                                                 | phenolic OH, aliphatic OH, methanol           |
| 1500-1650                      | C=C, C=O stretching                                                           | aromatic rings, carbonyl                      |
| 1420-1480                      | CH bending                                                                    | aliphatic                                     |
| 1360-1430                      | -OH, -CH bending<br>O=C=O group<br>-CH <sub>3</sub> deformation               | hydrocarbon, acid, phenol, olefin and alcohol |
| 1200-1300                      | C-O stretching                                                                | aryl-alkyl ether linkage, phenol              |
| 1000-1200                      | C=O stretching<br>C-O-C stretching/bending,<br>C-N, R-O-C/R-O-CH <sub>3</sub> | ketone, ether, phenol, chain anhydride        |
| 700-900                        | C-H                                                                           | aromatic hydrogen                             |
| 400-700                        | C-C stretch<br>C-O-H bending,                                                 |                                               |

15

16

17

18

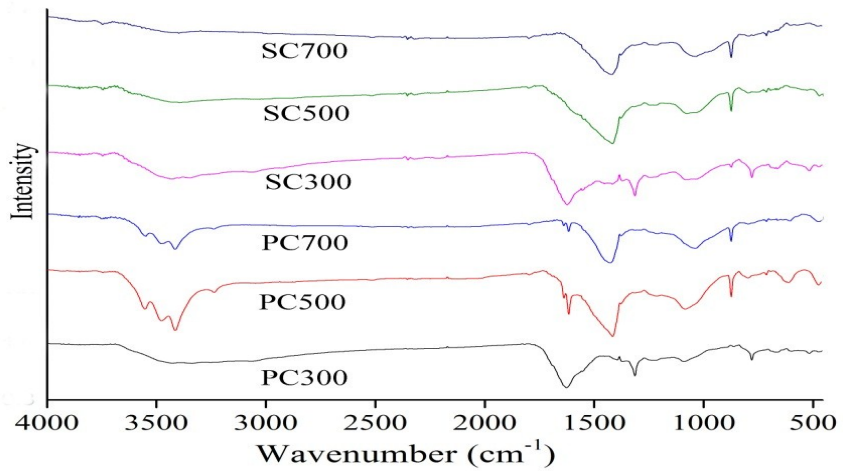

19

20 Fig. S1. FT-IR spectrum of the biochars.

21 Note: Spent *Pleurotus ostreatus* substrate biochar (PC) and spent *Shiitake* substrate biochar (SC).

22

23

24

25

26

27

28

29

30

31

32

33

34

35

36

37

38

39

40

41 Table S2 Comparison of adsorption capacities of different adsorbents for Cd used in different studies

| Adsorbents                                   | Sorption capacity (mg/g <sup>-1</sup> ) | References |
|----------------------------------------------|-----------------------------------------|------------|
| PHB                                          | 28.99                                   | 1          |
| Ipomoea biochars                             | 41.67–72.43                             | 2          |
| Modified rice straw biochar                  | 81.10                                   | 3          |
| Eichornia crassipes biochars                 | 34-70.31                                | 4          |
| Maize cob biochar                            | 33                                      | 5          |
| Date palm biochars                           | 26.96-43.58                             | 6          |
| Spent pleurotus ostreatus substrate biochars | 40.14-71.49                             | This study |
| Spent shiitake substrate biochars            | 37.67-46.87                             | This study |

42

- 43 1. Q. Cheng, Q. Huang, S. Khan, Y. Liu, Z. Liao, G. Li and Y. S. Ok, *Ecological Engineering*, 2016,  
 44 **87**, 240-245.
- 45 2. R. Goswami, J. Shim, S. Deka, D. Kumari, R. Kataki and M. Kumar, *Ecological Engineering*,  
 46 2016, **97**, 444-451.
- 47 3. B. Li, L. Yang, C. Q. Wang, Q. P. Zhang, Q. C. Liu, Y. D. Li and R. Xiao, *Chemosphere*, 2017,  
 48 **175**, 332-340.
- 49 4. F. Zhang, X. Wang, D. Yin, B. Peng, C. Tan, Y. Liu, X. Tan and S. Wu, *Journal of*  
 50 *environmental management*, 2015, **153**, 68-73.
- 51 5. M. Moyo, S. T. Lindiwe, E. Sebata, B. C. Nyamunda and U. Guyo, *Research on Chemical*  
 52 *Intermediates*, 2015, **42**, 1349-1362.
- 53 6. A. Usman, A. Sallam, M. Zhang, M. Vithanage, M. Ahmad, A. Al-Farraj, Y. S. Ok, A.  
 54 Abduljabbar and M. Al-Wabel, *Water, Air, & Soil Pollution*, 2016, **227**.

55

56
